# Supplementary material for: Architecture of the HCN selectivity filter and control of cation permeation
Source: PubMed Central journal article supplement — Sci Rep. 2012 Nov 27;2:894. doi: 10.1038/srep00894 (PMC3506978; doi:10.1038/srep00894), 2012-11-27
Supplement: srep00894-s1.pdf [file srep00894-s1.pdf]

**SUPPLEMENTARY INFORMATION**

**ARCHITECTURE OF THE HCN SELECTIVITY FILTER AND  
CONTROL OF CATION PERMEATION**

**Vincenzo Macri, Damiano Angoli and Eric A. Accili**

**Department of Cellular and Physiological Sciences,  
University of British Columbia, V6T 1Z3, Canada**

# Supplemental Figure 1

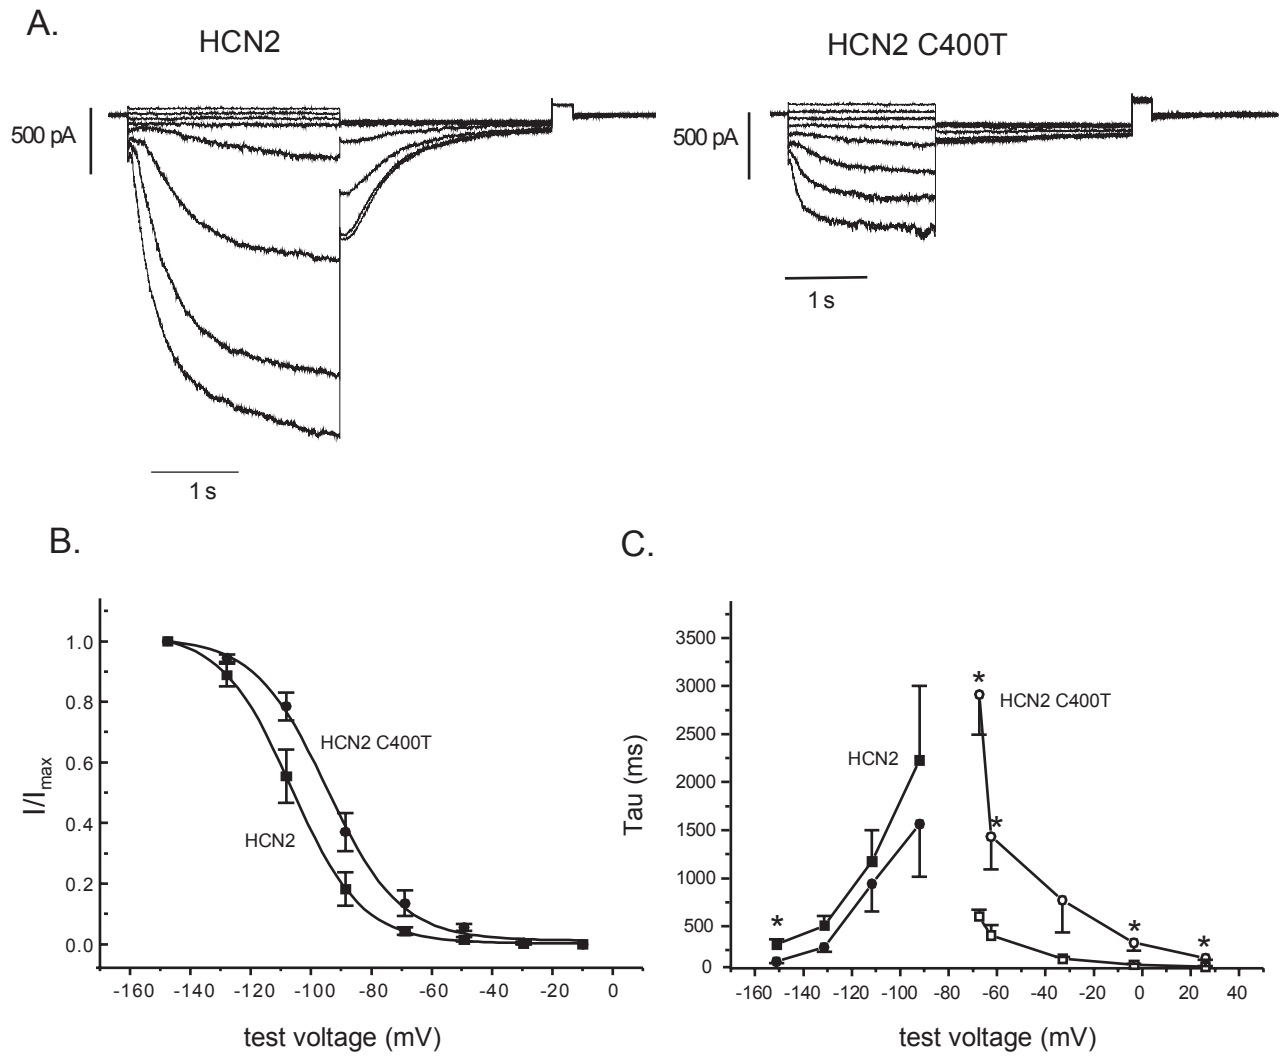

**Supplemental Figure 1. Substitution of cysteine 400 of HCN2 with threonine shifts the  $I_f$  activation curve to more positive potentials.**

**A.** Current traces recorded from two representative cells in response to 2-second test voltage steps ranging from -50 mV to -150 mV, in 20 mV increments from a holding potential of -35 mV, and returned to -65 mV to generate deactivating tail currents. Note the slower rates of deactivation in the mutant channel.

**B.**  $I_f$  activation curves generated from tail current amplitudes recorded in CHO cells expressing HCN2 (squares) or HCN2 C400T (circles) at -65 mV and normalized to the largest tail current amplitude elicited, as indicated in 'A' (black arrow). The data were fit with a first order Boltzmann equation,  $f(V) = I_{\max}/(1 + e^{(V_{1/2} - V)/k})$ . This fitting yielded  $V_{1/2}$  and  $k$  values of  $-107.7 \pm 4.1$  mV and  $9.7 \pm 1.0$  mV ( $n = 5$  cells) and  $-95.3 \pm 3.2$  mV and  $11.7 \pm 1.7$  mV ( $n = 6$  cells) for cells transfected with HCN2 or HCN2 C400T, respectively. Between the two groups of cells,  $V_{1/2}$  values were significantly different whereas the  $k$  values were not (unpaired t-test,  $p < 0.05$ ).

**C.** Time constants ( $\tau$ ) of  $I_f$  activation (filled symbols) or deactivation (closed symbols) versus test voltage determined from current traces recorded from CHO cells expressing HCN2 (squares) or HCN2 C400T (circles) (see Methods). Single asterisks indicate a significant difference between values for cells expressing HCN2 or HCN2 C400T.
